# Supplementary material
Source: MDPI journal article supplement (https://www.mdpi.com/1661-3821/2/2/8)
Supplement: s1 [file s1]

# Long-term pterostilbene supplementation of a high-fat diet increases Adiponectin expression in the subcutaneous white adipose tissue

Sofia Parrasia<sup>1,§,£</sup>, Eva Galletta<sup>1,2,£</sup>, Martina La Spina<sup>1,£</sup>, Arianna Magrini<sup>1,3</sup>, Michele Azzolini<sup>1,#</sup>, Marika Salvalaio<sup>4</sup>, Lucia Biasutto<sup>1,3,\*</sup>

<sup>1</sup> Dept. Biomedical Sciences, University of Padova, Padova, Italy

<sup>2</sup> Dept. Biology, University of Padova, Padova, Italy

<sup>3</sup> CNR Neuroscience Institute, Padova, Italy

<sup>4</sup> Dept. Pharmaceutical and Pharmacological Sciences, University of Padova, Padova, Italy

<sup>£</sup> these authors contributed equally to this work

<sup>§</sup> current address: Dept. Biology, University of Padova, Padova, Italy

<sup>#</sup> current address: Dept. Physiology and Pharmacology, Karolinska Institutet, Stockholm, Sweden.

<sup>\*</sup> Correspondence: lucia.biasutto@cnr.it; Tel.: +39 0498276054

## Supplementary Data

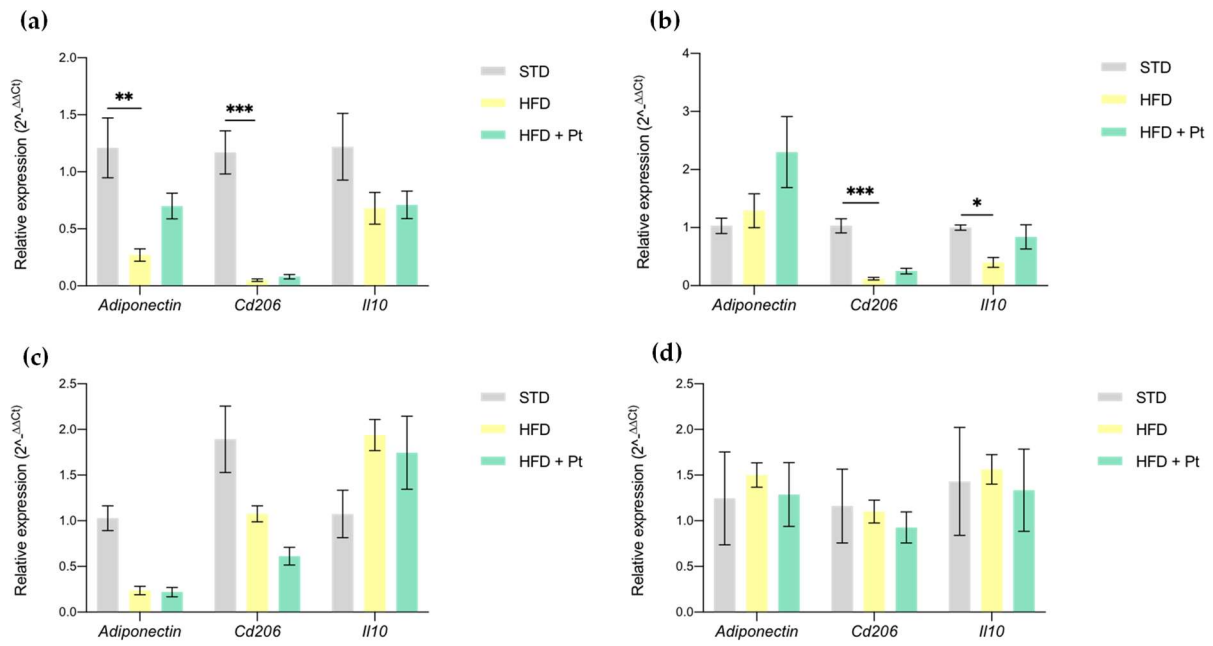

**Supplementary Figure S1.** Gene expression analysis of *Adiponectin*, *Cd206* and *Il10* in sWAT (a,b) and vWAT (c,d) from STD, HFD and HFD + Pt mice. Data from males (a,c) and females (b,d) were considered separately. Mean values  $\pm$  SEM are shown.  $N \geq 3$  for each condition.

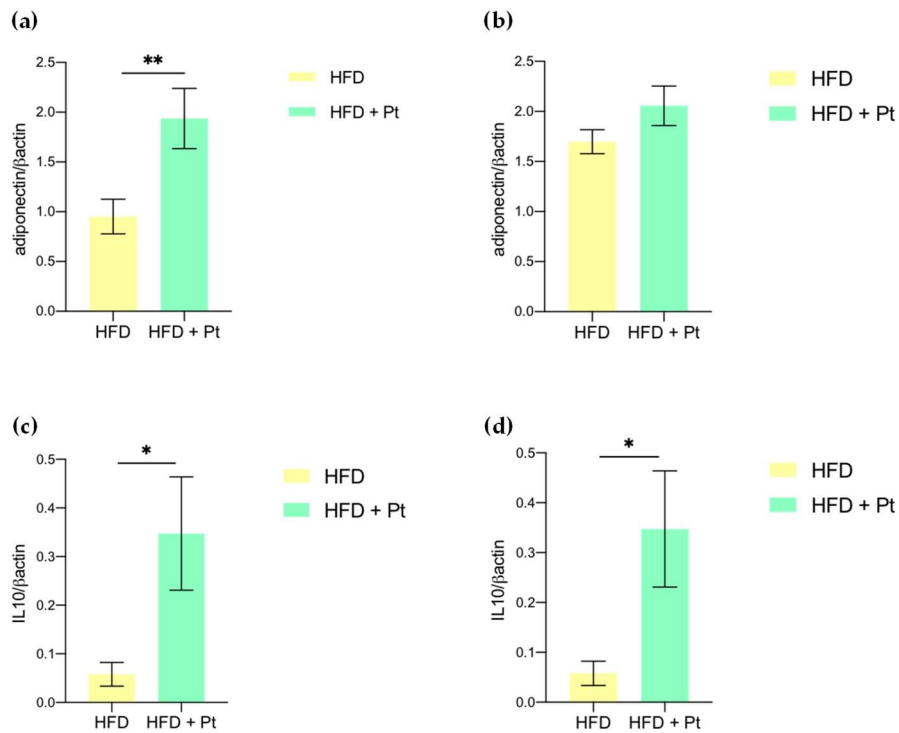

**Supplementary Figure S2.** Adiponectin and IL10 protein levels in sWAT from HFD and HFD + Pt mice. Western Blot quantification. Protein levels were normalized to  $\beta$ -actin. Data from males (a, c) and females (b, d) were considered separately. Mean values  $\pm$  SEM are shown,  $N \geq 4$  for each condition. Statistical analysis was performed using Mann-Whitney test.

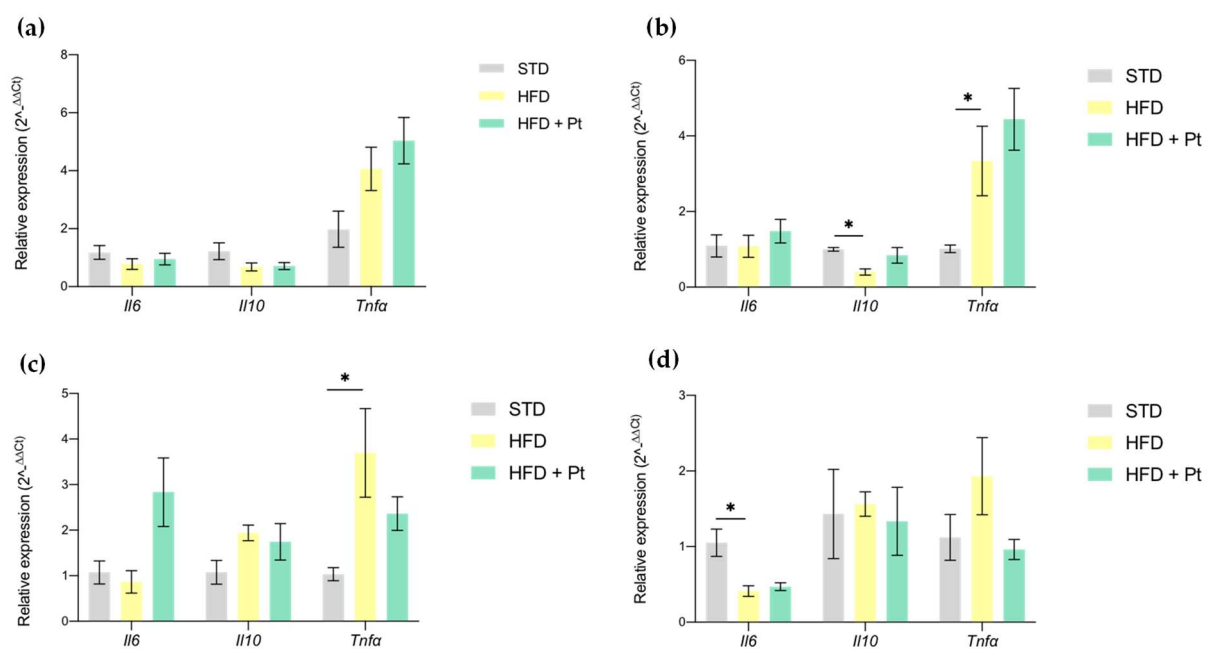

**Supplementary Figure S3.** Gene expression analysis of *Il6*, *Il10* and *Tnfa* in sWAT (a,b) and vWAT (c,d) from STD, HFD and HFD + Pt mice. Data from males (a,c) and females (b,d) were considered separately. Mean values  $\pm$  SEM.  $N \geq 3$  for each condition.

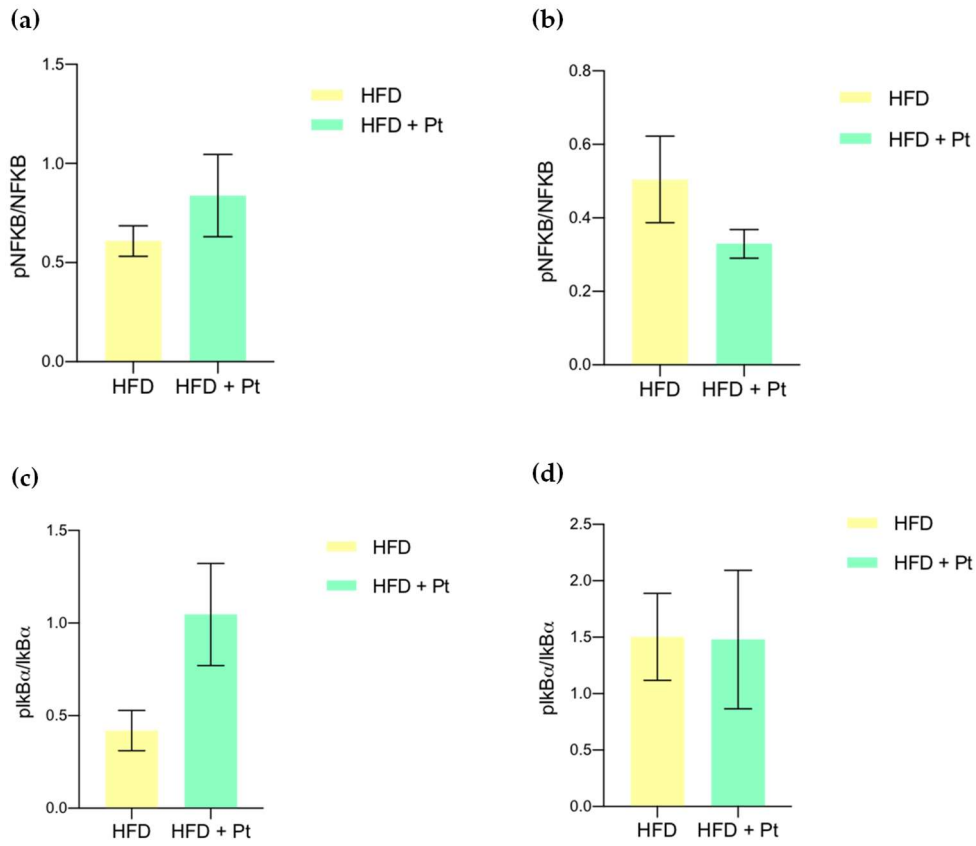

**Supplementary Figure S4.** pNFkB and pIKB $\alpha$  protein levels in SWAT from HFD and HFD + Pt mice. Western Blot quantification. Protein levels were normalized to total NFkB and IKB $\alpha$ . Data from males (a,c) and females (b,d) were considered separately. Mean values  $\pm$  SEM.  $N \geq 3$  for each condition.

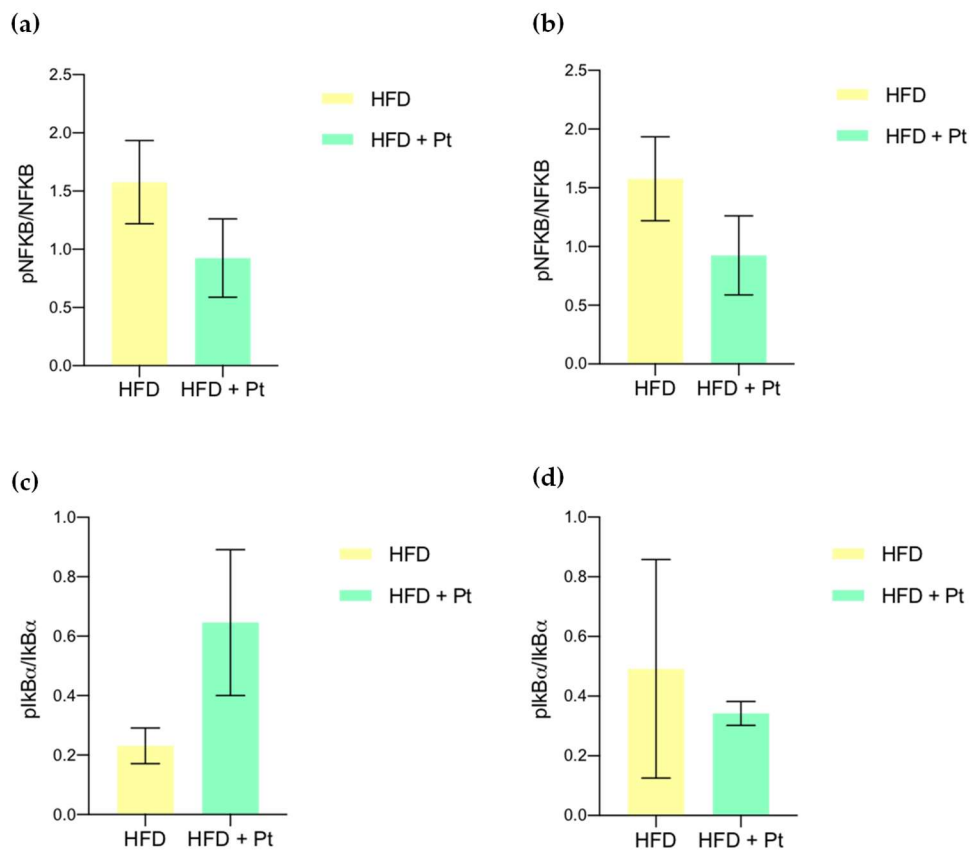

**Supplementary Figure S5.** pNFkB and pIKBα protein levels in vWAT from HFD and HFD + Pt mice. Western Blot quantification. Protein levels were normalized to total NFkB and IKBα. Data from males (**a,c**) and females (**b,d**) were considered separately. Mean values ± SEM. N ≥ 3 for each condition.
